# Supplementary material for: Rapid and Cost-Efficient Detection of RET Rearrangements in a Large Consecutive Series of Lung Carcinomas
Source: MDPI journal article supplement (doi:10.3390/ijms241310530), 2023-06-23
Supplement: s1 [file s1]

Table S1. Frequency of *RET* rearrangements in tumors with various deltaCt values produced by the 5'/3'-end expression test

|                                                           | dCt $\geq 3$ | $3 > \text{dCt} \geq 2$ | $2 > \text{dCt} \geq 1$ | $1 > \text{dCt} \geq 0$ | $0 > \text{dCt} \geq -1$ | $-1 > \text{dCt} \geq -2$ | $-2 > \text{dCt} \geq -3$ | $-3 < \text{dCt}$ | Total |
|-----------------------------------------------------------|--------------|-------------------------|-------------------------|-------------------------|--------------------------|---------------------------|---------------------------|-------------------|-------|
| Total                                                     | 184          | 385                     | 1587                    | 3966                    | 4510                     | 2797                      | 809                       | 211               | 14449 |
| Tumors tested for 8 common translocations                 | 169          | 55                      | 152                     | 1006                    | 1830                     | 1182                      | 367                       | 88                | 4849  |
| <i>RET</i> -rearranged tumors (8 common variants)         | 152          | 18                      | 6                       | 3                       | 5                        | 1                         | 0                         | 0                 | 185   |
| <i>RET</i> -rearranged tumors (common and rare variants)* | 163*         | 19*                     | 6                       | 3                       | 5                        | 1                         | 0                         | 0                 | 197   |

\*Comprehensive analysis for all variants of *RET* rearrangements, which involved variant-specific PCR for common and rare fusions coupled with RNA-based NGS, was applied only to NSCLCs with deltaCt  $\geq 3$ . Four tumors with deltaCt slightly below 3 were tested by PCR both for common and rare rearrangements. The remaining NSCLCs were analyzed only for eight common translocation variants.

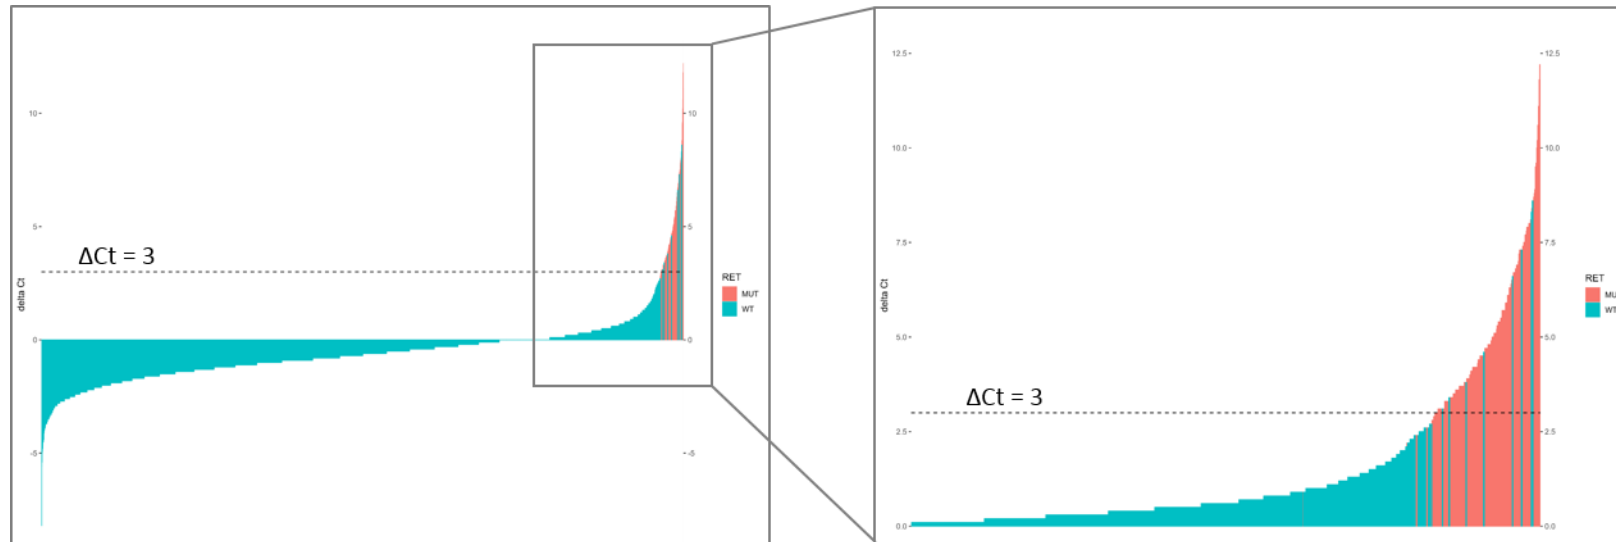

Figure S1. Distribution of *RET*-rearranged and *RET*-wild-type tumors depending on 5'/3'-end expression ratio (dCt).

Table S2. Distribution of *ALK*, *ROS1* and *RET* fusion-positive cases in male and female patients

|        | NSCLC cases<br>with <i>RET</i> fusions | NSCLC cases<br>with <i>ALK</i> fusions | NSCLC cases<br>with <i>ROS1</i> fusions | Consecutive*<br>NSCLC cases |
|--------|----------------------------------------|----------------------------------------|-----------------------------------------|-----------------------------|
| Total  | 197                                    | 728                                    | 204                                     | 6153                        |
| Female | 135 (68.5%)                            | 480 (65.9%)                            | 148 (72.5%)                             | 2005 (32.6%)                |
| Male   | 62 (31.5%)                             | 248 (34.1%)                            | 56 (27.5%)                              | 4148 (67.4%)                |

\*all NSCLC cases referred to molecular testing in the N.N. Petrov Institute of Oncology during the period from May 2021 to February 2023.

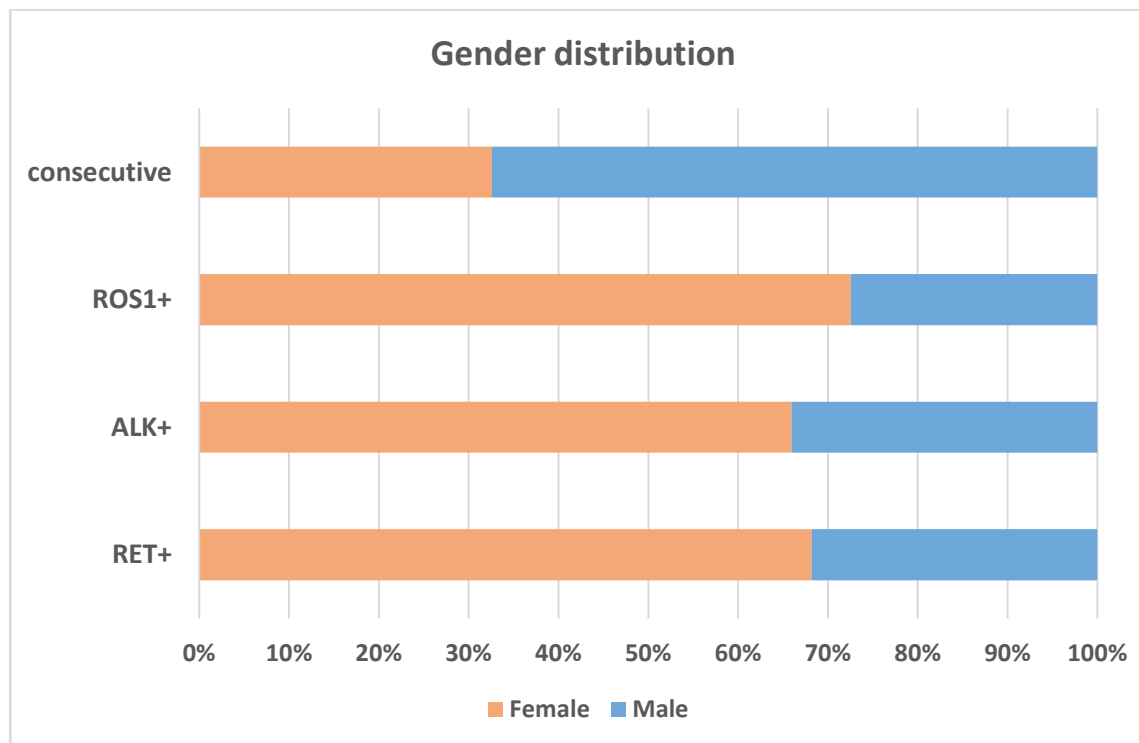

Figure S2. Distribution of *ALK*, *ROS1* and *RET* fusion-positive cases according to gender.

Table S3. Distribution of *ALK*, *ROS1* and *RET* fusion-positive cases according to smoking status and gender

|                | NSCLC cases with <i>RET</i> -fusions (n = 79) | NSCLC cases with <i>ALK</i> -fusions (n = 342) | NSCLC cases with <i>ROS1</i> -fusions (n = 78) | Consecutive NSCLC cases (n = 2060)* |
|----------------|-----------------------------------------------|------------------------------------------------|------------------------------------------------|-------------------------------------|
| Smoking status |                                               |                                                |                                                |                                     |
| Never          | 61                                            | 254                                            | 61                                             | 993                                 |
| Female         | 42 (69%)                                      | 198 (88%)                                      | 52 (85%)                                       | 591 (60%)                           |
| Male           | 19 (31%)                                      | 56 (22%)                                       | 9 (15%)                                        | 402 (40%)                           |
| Ever           | 18                                            | 88                                             | 17                                             | 1067                                |
| Female         | 5 (28%)                                       | 17 (19%)                                       | 3 (18%)                                        | 88 (8%)                             |
| Male           | 13 (72%)                                      | 71 (81%)                                       | 14 (82%)                                       | 979 (92%)                           |

\*This Table considers patients with known self-reported smoking status

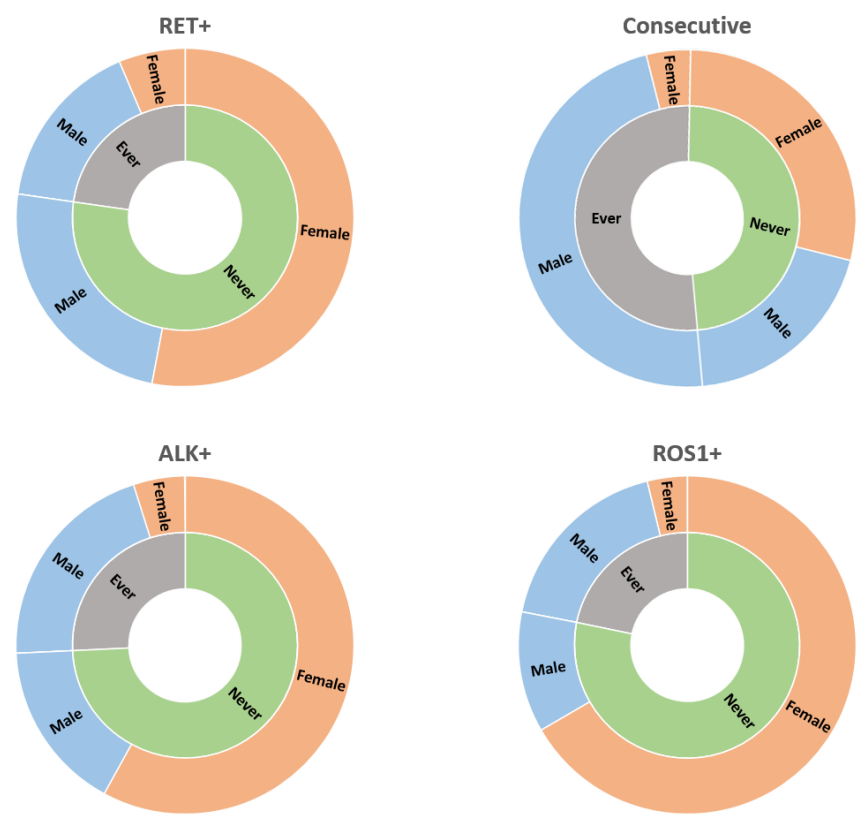

Figure S3. Distribution of *ALK*, *ROS1* and *RET* fusion-positive cases according to smoking status and gender

Table S4. Median age in male and female patients with *ALK*, *ROS1* and *RET* fusions

|                               | NSCLC cases with <i>RET</i> fusions |       | NSCLC cases with <i>ALK</i> fusions |       | NSCLC cases with <i>ROS1</i> fusions |       | Consecutive NSCLC cases |       |
|-------------------------------|-------------------------------------|-------|-------------------------------------|-------|--------------------------------------|-------|-------------------------|-------|
| Median age (age range), years | 61 (24-82)                          |       | 58 (17-89)                          |       | 59 (22-82)                           |       | 64 (17-90)              |       |
|                               | Females                             | Males | Females                             | Males | Females                              | Males | Females                 | Males |
| Median age, years             | 63                                  | 60    | 59                                  | 58    | 60                                   | 59    | 64                      | 64    |

Table S5. Distribution of cases with *ALK*, *ROS1* and *RET* fusions in various age groups according to gender

| Age group, years | NSCLC cases with <i>RET</i> fusions (n = 197) |            | NSCLC cases with <i>ALK</i> fusions (n = 728) |            | NSCLC cases with <i>ROS1</i> fusions (n = 204) |            | Consecutive NSCLC cases (n = 6153) |             |
|------------------|-----------------------------------------------|------------|-----------------------------------------------|------------|------------------------------------------------|------------|------------------------------------|-------------|
|                  | Female                                        | Male       | Female                                        | Male       | Female                                         | Male       | Female                             | Male        |
|                  | 135                                           | 62         | 480                                           | 248        | 148                                            | 56         | 2005                               | 4148        |
| <=30             | 2 (1%)                                        |            | 17 (2.3%)                                     |            | 4 (2%)                                         |            | 14 (0.2%)                          |             |
|                  | 2 (1.5%)                                      | 0          | 11 (2.3%)                                     | 6 (2.4%)   | 3 (2%)                                         | 1 (1.8%)   | 7 (0.3%)                           | 7 (0.7%)    |
| 31-40            | 9 (4.6%)                                      |            | 69 (9.5%)                                     |            | 20 (9.8%)                                      |            | 130 (2.1%)                         |             |
|                  | 5 (3.7%)                                      | 4 (6.5%)   | 40 (8.3%)                                     | 29 (11.7%) | 16 (10.8%)                                     | 4 (7.1%)   | 71 (3.5%)                          | 59 (1.4%)   |
| 41-50            | 19 (9.6%)                                     |            | 123 (16.9%)                                   |            | 31 (15.2%)                                     |            | 459 (7.5%)                         |             |
|                  | 11 (8.2%)                                     | 8 (12.9%)  | 78 (16.3%)                                    | 45 (18.1%) | 19 (12.8%)                                     | 12 (21.4%) | 174 (8.7%)                         | 285 (6.9%)  |
| 51-60            | 62 (31.5%)                                    |            | 208 (28.6%)                                   |            | 55 (27%)                                       |            | 1466 (23.8%)                       |             |
|                  | 39 (28.9%)                                    | 23 (37.1%) | 135 (28.1)                                    | 73 (29.4%) | 37 (25%)                                       | 18 (32.1%) | 430 (21.4%)                        | 1036 (25%)  |
| 61-70            | 69 (35.0%)                                    |            | 208 (28.6%)                                   |            | 66 (32.4%)                                     |            | 2819 (45.8%)                       |             |
|                  | 50 (37.0%)                                    | 19 (30.6%) | 143 (29.8%)                                   | 65 (26.2%) | 50 (33.8%)                                     | 16 (28.6%) | 828 (41.3%)                        | 1991 (48%)  |
| 71-80            | 30 (15.2%)                                    |            | 87 (12%)                                      |            | 26 (12.7%)                                     |            | 1118 (18.2%)                       |             |
|                  | 22 (16.3%)                                    | 8 (12.9%)  | 63 (13.1%)                                    | 24 (9.7%)  | 22 (14.9%)                                     | 4 (7%)     | 418 (20.8%)                        | 700 (16.9%) |
| >80              | 6 (3.1%)                                      |            | 13 (1.8%)                                     |            | 2 (1%)                                         |            | 136 (2.2%)                         |             |
|                  | 6 (4.4%)                                      | 0          | 9 (1.9%)                                      | 4 (1.6%)   | 1 (0.7%)                                       | 1 (1.8%)   | 75 (3.7%)                          | 61 (1.5%)   |

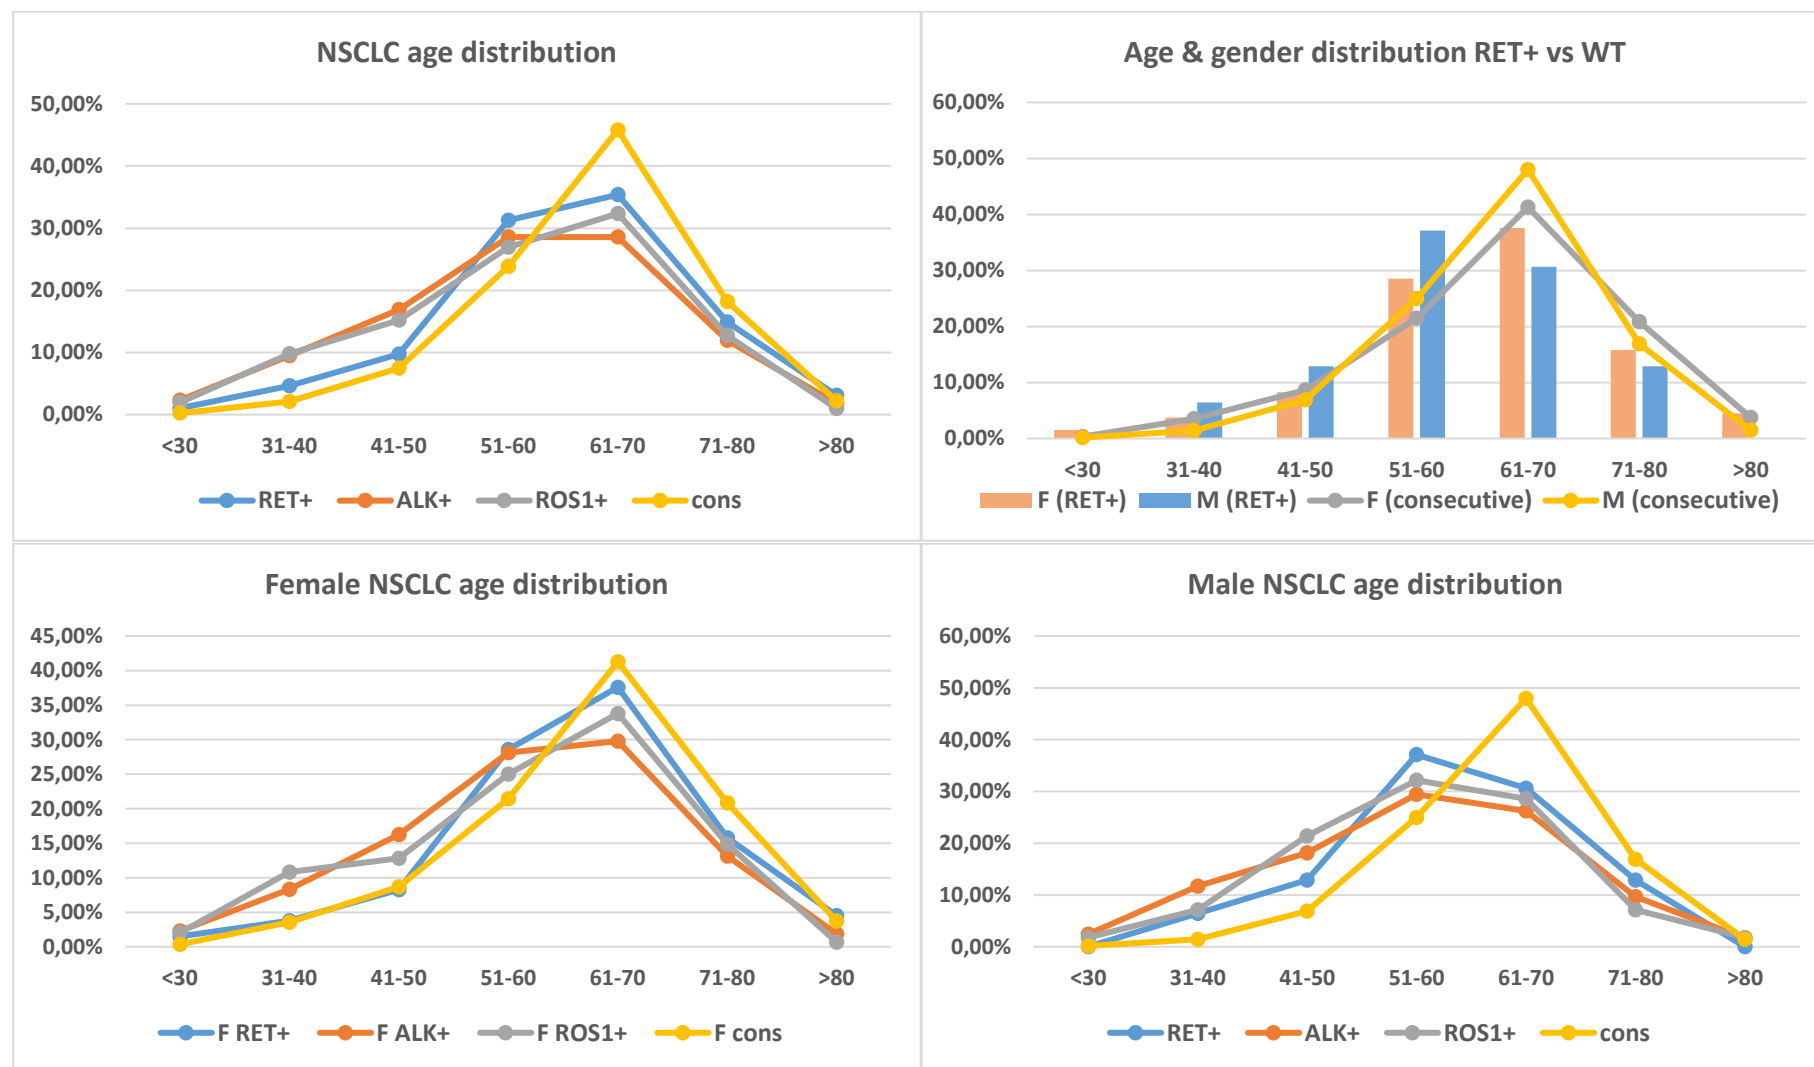

Figure S4. Distribution of cases with *ALK*, *ROS1* and *RET* fusions in various age groups according to gender.

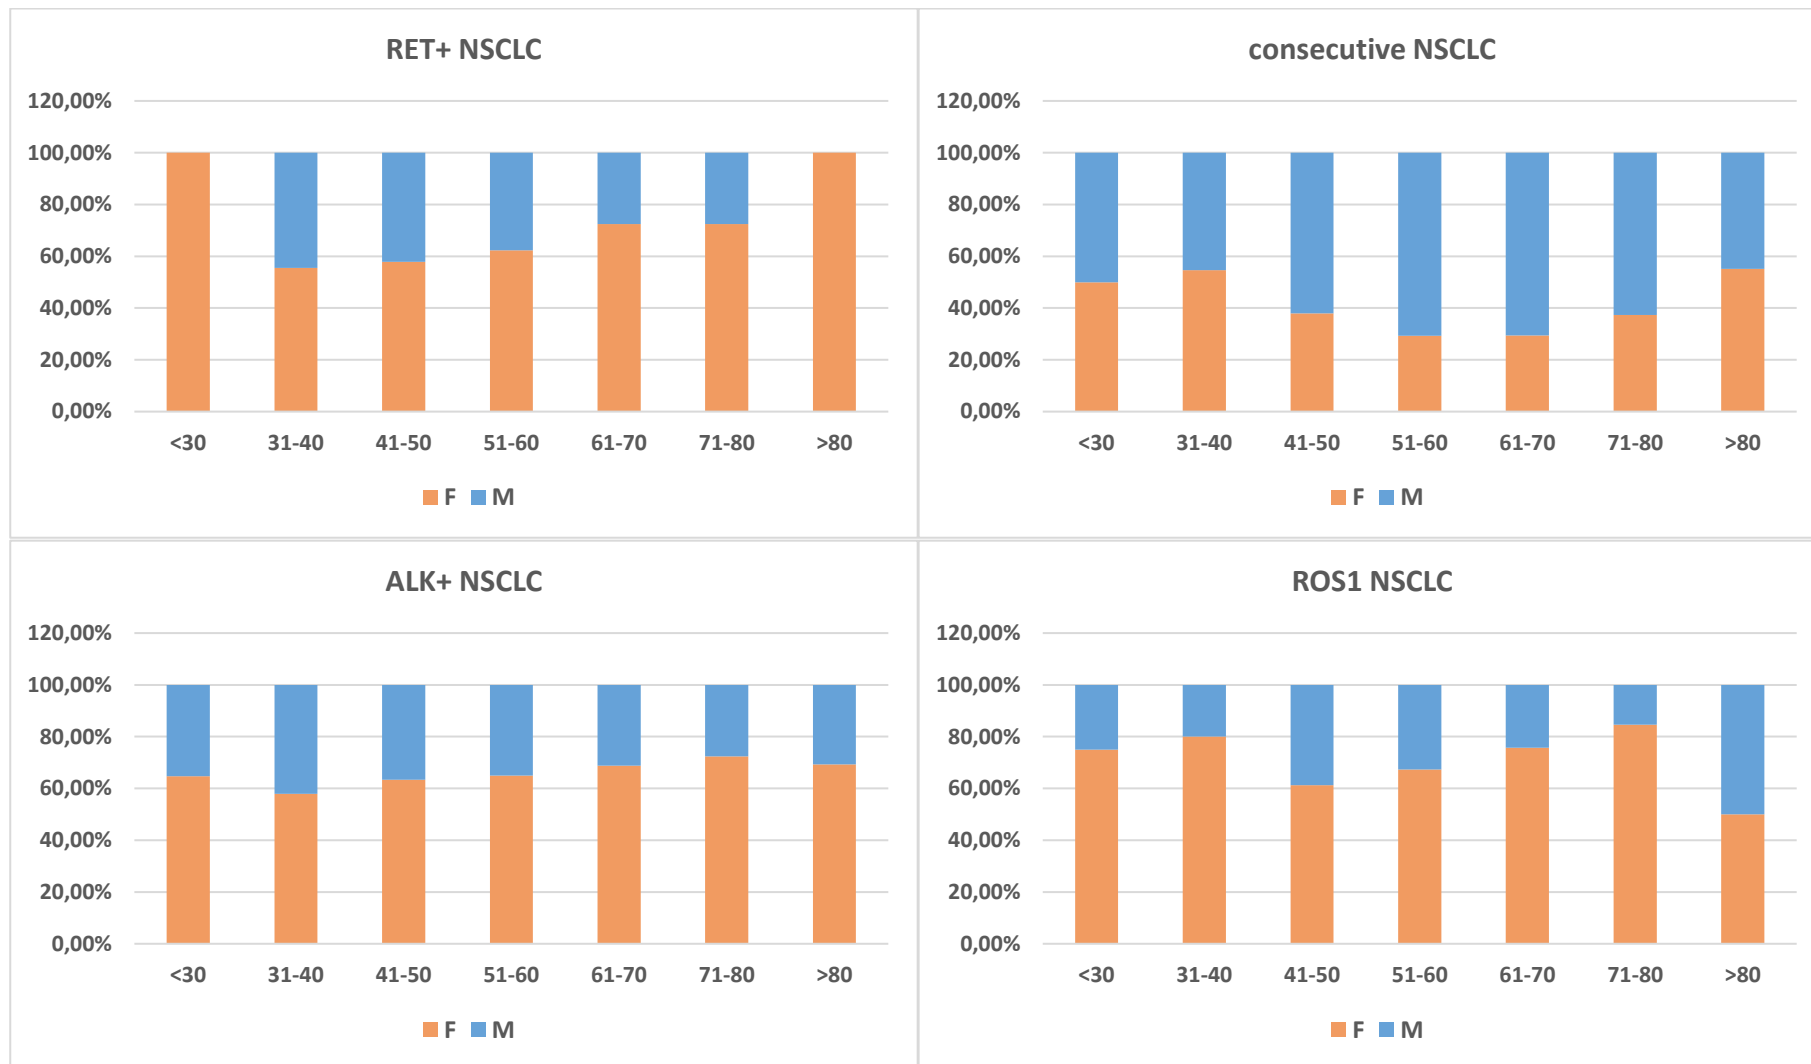

Figure S5. Distribution of cases with *ALK*, *ROS1* and *RET* fusions in various age groups according to gender.

Table S6. Gene-specific primers utilized in RT reaction

| Target fragment               | Oligonucleotide name | Sequence             |
|-------------------------------|----------------------|----------------------|
| <i>SDHA</i> (exons 5-6)       | SDHAex6_RT           | CACTCCCCGTTCTCCATCA  |
| <i>RET</i> -5' (exons 6-7)    | RETex7_RT            | CCACTGAATGCCTGGCAGT  |
| <i>RET</i> -3' (exons 13-14)  | RETex14_RT           | CCCAC TTTGCGGCTCTCG  |
| <i>RET</i> variants (exon 12) | RETex12_RT           | TCCAAATTGCGCTTCTCCTA |

Table S7. PCR primers and probes utilized in the *RET* 5'/3'-end expression imbalance test

| Target fragment                                                                   | Oligonucleotide name | Sequence                         | PCR fragment length, bp |
|-----------------------------------------------------------------------------------|----------------------|----------------------------------|-------------------------|
| Test for RNA integrity and amount (amplification of a housekeeping gene fragment) |                      |                                  |                         |
| <i>SDHA</i><br>(exons 5-6)                                                        | SDHAex5-F            | CCACTCGCTATTGCACACC              | 78                      |
|                                                                                   | SDHAex6-R            | TCCAAGGCAAATACTCCAC              |                         |
|                                                                                   | SDHAex5/6-P          | R6G-AAGGTCTCTGCGATATGATACC-BHQ2  |                         |
| Test for <i>RET</i> 5'/3'-unbalanced expression (multiplex reaction)              |                      |                                  |                         |
| <i>RET</i> 5'-<br>fragment<br>(exons 6-7)                                         | RETex6-F             | AGGAGGGCTCGCCGATTTG              | 70                      |
|                                                                                   | RETex7-R             | TGATGCCACTGAATGCCTG              |                         |
|                                                                                   | RETex6/7-P           | FAM-CAGTTTTCCACACAGACTTTCCC-BHQ1 |                         |
| <i>RET</i> 3'-<br>fragment<br>(exons 13-14)                                       | RETex13-F            | TCATCAAATTGTATGGGGCCT            | 67                      |
|                                                                                   | RETex14-R            | TATTTGGCGTACTCCACGATG            |                         |
|                                                                                   | RETex13/14-P         | R6G-AGCCAGGATGGCCCCGCTCCTC-BHQ2  |                         |

Table S8. PCR primers and probes for the variant-specific detection of *RET* translocations\*

| Fusion                                                      | Breakpoint       | Oligos for 5'-companions          | Oligos for 3'-companion                 |
|-------------------------------------------------------------|------------------|-----------------------------------|-----------------------------------------|
| <i>For common variants of RET-translocation (multiplex)</i> |                  |                                   |                                         |
| <i>CCDC6::RET</i>                                           | <i>(C1;R12)</i>  | Forward: GCAAAGCCAGCGTGACCAT      | Reverse: TAGAGTTTTTCCAAGAACCAAG         |
| <i>KIF5B::RET</i>                                           | <i>(K15;R12)</i> | Forward: GCTGTGGGAAATAATGATGTAA   | Probe: FAM-CTTCCGAGGGAATTCCCACTTTG-BHQ1 |
|                                                             | <i>(K16;R12)</i> | Forward: AGGAGTTAGCAGCATGTCAG     |                                         |
|                                                             | <i>(K22;R12)</i> | Forward: CTTTGTTCAGGACCTGGCTA     |                                         |
|                                                             | <i>(K23;R12)</i> | Forward: ATAATCTTGAACAGCTCACTAAA  |                                         |
|                                                             | <i>(K24;R12)</i> | Forward: GTCAAAGAATATGGCCAGAAG    |                                         |
| <i>NCOA4::RET</i>                                           | <i>(N7;R12)</i>  | Forward: AGGCTGTATCTCCATGCCA      |                                         |
|                                                             | <i>(N8;R12)</i>  | Forward: AGCAGACCTTGGAGAACAGT     |                                         |
| <i>For rare variants of RET-translocation (multiplex 1)</i> |                  |                                   |                                         |
| <i>CUX1::RET</i>                                            | <i>(C10;R12)</i> | Forward: AGATCCAGAAGGCACCA        | Reverse: TAGAGTTTTTCCAAGAACCAAG         |
| <i>FYCO1::RET</i>                                           | <i>(F8;R12)</i>  | Forward: GCTGAAATCATGGACTACCA     | Probe: FAM-CTTCCGAGGGAATTCCCACTTTG-BHQ1 |
| <i>ITGA8::RET</i>                                           | <i>(I30;R12)</i> | Forward: ACCGACAGGGAACAGC         |                                         |
| <i>KIF5B::RET</i>                                           | <i>(K19;R12)</i> | Forward: GTAGAAAGCAAAAGCAAACTTAT  |                                         |
| <i>MPRIIP::RET</i>                                          | <i>(M19;R12)</i> | Forward: CACAGGGCAAGGATGC         |                                         |
| <i>RELCH::RET</i>                                           | <i>(R10;R12)</i> | Forward: CATTGTTCCCAATGTGCTATT    |                                         |
| <i>SLC39A8::RET</i>                                         | <i>(S6;R12)</i>  | Forward: TCCATTTTGATAATGTCAGTGT   |                                         |
| <i>TRIM33::RET</i>                                          | <i>(T14;R12)</i> | Forward: CAGGAGGAGTGCTTGCA        |                                         |
| <i>ZBTB41::RET</i>                                          | <i>(Z9;R12)</i>  | Forward: AGGCAAATCAAGTCTGGAA      |                                         |
| <i>For rare variants of RET-translocation (multiplex 2)</i> |                  |                                   |                                         |
| <i>ADD3::RET</i>                                            | <i>(A1;R12)</i>  | Forward: AGGGAGGGGAAACACAA        | Reverse: TAGAGTTTTTCCAAGAACCAAG         |
| <i>ANKS1B::RET</i>                                          | <i>(A1;R12)</i>  | Forward: AGCCCTCGCGGATC           | Probe: FAM-CTTCCGAGGGAATTCCCACTTTG-BHQ1 |
| <i>CCDC186::RET</i>                                         | <i>(C10;R12)</i> | Forward: TAGAGTTTTTCCAAGAACCAAG   |                                         |
| <i>FRMD4A::RET</i>                                          | <i>(F12;R12)</i> | Forward: GTATGACTACCATGATAAAGTGAA |                                         |
| <i>KIAA1217::RET</i>                                        | <i>(K11;R12)</i> | Forward: CTTTCCTCCTGCGTCAAG       |                                         |
| <i>KIF13A::RET</i>                                          | <i>(K18;R12)</i> | Forward: AACCTCAGTGCCAATAGGAA     |                                         |
| <i>MYO5C::RET</i>                                           | <i>(M25;R12)</i> | Forward: TCACTTCTGATGGCTTGAA      |                                         |
| <i>RASSF4::RET</i>                                          | <i>(R3;R12)</i>  | Forward: AGGGCAAGAGCTTCCA         |                                         |
| <i>TBC1D32::RET</i>                                         | <i>(T9;R12)</i>  | Forward: GTTGATACCAAGGCTGTGT      |                                         |
| <i>WAC::RET</i>                                             | <i>(W3;R12)</i>  | Forward: ACAGAGTTAGAGAGAGGGATGGT  |                                         |



| Fusion                                                      | Breakpoint | Oligos for 5'-companions         | Oligos for 3'-companion                 |
|-------------------------------------------------------------|------------|----------------------------------|-----------------------------------------|
| <i>For rare variants of RET-translocation (multiplex 3)</i> |            |                                  |                                         |
| <i>CCNYL2::RET</i>                                          | (C6;R12)   | Forward: CATATTTGATGAACAGTTACACC | Reverse: TAGAGTTTTTCCAAGAACCAAG         |
| <i>LSM14A::RET</i>                                          | (L9;R12)   | Forward: GAGTTTGCGGATTTTGAATATAG | Probe: FAM-CTTCCGAGGGAATTCCCACTTTG-BHQ1 |
| <i>PCM1::RET</i>                                            | (P29;R12)  | Forward: GCAATTATGAAAGAAGTCATTCC |                                         |
| <i>PRKG1::RET</i>                                           | (P7;R12)   | Forward: AGGAAAAGGAGACTGGTTT     |                                         |
| <i>PTPRK::RET</i>                                           | (P3;R12)   | Forward: GCAGTGAGCACCTTTTG       |                                         |
| <i>RUFY2::RET</i>                                           | (R9;R12)   | Forward: TTAATGAAAACACAGCAGCA    |                                         |
| <i>SIRT1::RET</i>                                           | (S8;R12)   | Forward: GGCAAAGGAGCAGATTAGTA    |                                         |
| <i>SLC25A36::RET</i>                                        | (S1;R12)   | Forward: CGCTGGTGCATCTGTT        |                                         |
| <i>SORBS1::RET</i>                                          | (S8;R12)   | Forward: ATCCCAACCTTCCTTCTGA     |                                         |
| <i>TSSK4::RET</i>                                           | (T1;R12)   | Forward: TTCCTGCCCCGTGAA         |                                         |

\*all fusions are designated using Ensembl canonical transcripts for the involved genes.

Table S9. PCR primers and probes for the analysis of *TYMS* expression

| Target fragment                                                                   | Oligonucleotide name | Sequence                           | PCR fragment length, bp |
|-----------------------------------------------------------------------------------|----------------------|------------------------------------|-------------------------|
| Test for RNA integrity and amount (amplification of a housekeeping gene fragment) |                      |                                    |                         |
| <i>SDHA</i><br>(exons 5-6)                                                        | SDHAex5-F            | CCACTCGCTATTGCACACC                | 78                      |
|                                                                                   | SDHAex6-R            | TCCAAGGCAAATACTCCAC                |                         |
|                                                                                   | SDHAex5/6-P          | R6G-AAGGTCTCTGCGATATGATACC-BHQ2    |                         |
| Test for <i>TYMS</i> expression                                                   |                      |                                    |                         |
| <i>TYMS</i><br>(exons 6-7)                                                        | TYMSex6-F            | ACACACTTTGGGAGATGCAC               | 85                      |
|                                                                                   | TYMSex7-R            | TGGGAAAGGTCTGGGTTCTC               |                         |
|                                                                                   | TYMSex6/7-P          | FAM-AGCCACTGAAAATTCAGCTTCAGCG-BHQ1 |                         |

All PCR reactions contained 1 µl of cDNA sample, 1× GeneAmp PCR Buffer I (Applied Biosystems, USA), 250 mkM of each dNTP, 200 nM of each primer and probe, 2.5 mM MgCl<sub>2</sub>, and 1 U of TaqM polymerase (AlkorBio, Russia) in a total volume of 20 µl. PCR was initiated by the enzyme activation (95°C, 10 min.) and included 38 cycles (95°C for 15 sec. followed by 58°C for 1 min.).
